# Supplementary material for: Biofilm Formation Reduction by Eugenol and Thymol on Biodegradable Food Packaging Material
Source: MDPI journal article supplement (doi:10.3390/foods11010002), 2021-12-21
Supplement: s1 [file s1]

*Supplementary Materials*

# Biofilm formation reduction by eugenol and thymol on biodegradable food packaging material

Pavel Pleva <sup>1</sup>, Lucie Bartošová<sup>1</sup> Daniela Máčalová<sup>1</sup>, Ludmila Zálešáková<sup>2</sup>, Jana Sedlaříková<sup>3</sup> and Magda Janalíková<sup>1,\*</sup>

<sup>1</sup> Department of Environmental Protection Engineering, Faculty of Technology, Tomas Bata University in Zlin, 275 Vavreckova, 76001 Zlin, Czech Republic; ppleva@utb.cz

<sup>2</sup> Department of Food Technology, Faculty of Technology, Tomas Bata University in Zlin, nam. T. G. Masaryka 5555, 76001, Zlin, Czech Republic; e-mail@e-mail.com

<sup>3</sup> Department of Fat, Surfactant and Cosmetics Technology, Faculty of Technology, Tomas Bata University in Zlin, 275 Vavreckova, 76001 Zlin, Czech Republic; e-mail@e-mail.com

\* Correspondence: e-mail@e-mail.com; Tel.: (optional; include country code; if there are multiple corresponding authors, add author initials)

In this Supplementary Materials, the following tables and figure are presented:

**Table S1.** Comparison of methods for evaluating the biofilm formation.

**Figure S1.** The FTIR spectra of pure and modified polymers in the range 4000 to 3000 cm<sup>-1</sup>; PLA: poly(lactic) acid, PBAT: poly(butylene adipate-co-terephthalate), PBS: poly(butylene succinate), E: 3% w/v eugenol, T: 3% w/v thymol.

**Table S1.** Comparison of methods for evaluating the biofilm formation.

| Material | Method                         | <i>B. tequilensis</i> | <i>B. subtilis</i> | <i>B. pumilus</i> | <i>S. maltophilia</i> | <i>E. coli</i> | <i>S. aureus</i> |
|----------|--------------------------------|-----------------------|--------------------|-------------------|-----------------------|----------------|------------------|
|          |                                | R23                   | R25                | R34               | GK CIP 1/1            | ATCC 25922     | ATCC 25923       |
| PLA      | MTT assay                      | -                     | -                  | -                 | -                     | -              | -                |
|          | Christensen method             | -                     | -                  | -                 | -                     | -              | -                |
|          | Fluorescence microscopy (LIVE) | +++                   | +++                | +++               | +                     | +++            | +++              |
|          | Fluorescence microscopy (DEAD) | +                     | -                  | -                 | +                     | ++             | ++               |
| PLA/T    | MTT assay                      | -                     | -                  | -                 | -                     | -              | -                |
|          | Christensen method             | -                     | -                  | -                 | -                     | -              | -                |
|          | Fluorescence microscopy (LIVE) | -                     | -                  | -                 | -                     | -              | -                |
|          | Fluorescence microscopy (DEAD) | -                     | -                  | -                 | -                     | -              | -                |
| PLA/E    | MTT assay                      | -                     | -                  | -                 | -                     | -              | -                |
|          | Christensen method             | -                     | -                  | -                 | -                     | -              | -                |
|          | Fluorescence microscopy (LIVE) | -                     | -                  | -                 | -                     | -              | -                |
|          | Fluorescence microscopy (DEAD) | -                     | -                  | -                 | -                     | -              | -                |
| PBS      | MTT assay                      | +                     | +                  | +                 | +                     | +              | +                |
|          | Christensen method             | -                     | -                  | +                 | +                     | -              | -                |
|          | Fluorescence microscopy (LIVE) | -                     | ++                 | -                 | ++                    | -              | +                |
|          | Fluorescence microscopy (DEAD) | ++                    | +                  | ++                | +                     | +++            | +                |
| PBS/T    | MTT assay                      | -                     | -                  | -                 | -                     | -              | -                |
|          | Christensen method             | -                     | -                  | -                 | -                     | -              | -                |
|          | Fluorescence microscopy (LIVE) | -                     | -                  | -                 | -                     | -              | -                |
|          | Fluorescence microscopy (DEAD) | -                     | -                  | -                 | -                     | -              | -                |
| PBS/E    | MTT assay                      | -                     | -                  | -                 | -                     | -              | -                |
|          | Christensen method             | -                     | -                  | -                 | -                     | -              | -                |
|          | Fluorescence microscopy (LIVE) | -                     | -                  | -                 | -                     | -              | -                |
|          | Fluorescence microscopy (DEAD) | -                     | -                  | -                 | -                     | -              | -                |
| PBAT     | MTT assay                      | -                     | -                  | -                 | -                     | -              | -                |
|          | Christensen method             | +                     | +                  | +                 | +                     | +              | +                |
|          | Fluorescence microscopy (LIVE) | -                     | -                  | -                 | +                     | +++            | -                |
|          | Fluorescence microscopy (DEAD) | -                     | -                  | -                 | -                     | +++            | -                |
| PBAT/T   | MTT assay                      | -                     | -                  | -                 | -                     | -              | -                |
|          | Christensen method             | -                     | -                  | -                 | -                     | -              | -                |
|          | Fluorescence microscopy (LIVE) | -                     | -                  | -                 | -                     | -              | -                |
|          | Fluorescence microscopy (DEAD) | -                     | -                  | -                 | -                     | -              | -                |
| PBAT/E   | MTT assay                      | -                     | -                  | -                 | -                     | -              | -                |
|          | Christensen method             | -                     | -                  | -                 | -                     | -              | -                |
|          | Fluorescence microscopy (LIVE) | -                     | -                  | -                 | -                     | -              | -                |
|          | Fluorescence microscopy (DEAD) | -                     | -                  | -                 | -                     | -              | -                |

PLA: poly(lactic) acid, PBAT: poly(butylene adipate-co-terephthalate), PBS: poly(butylene succinate), T: 3% w/v thymol, E: 3% w/v eugenol.

MTT assay and Christensen method: -: non-biofilm formation, +: with weak biofilm formation, ++: with strong biofilm formation ( $p < 0.003$ ).

Fluorescence microscopy: -: without microorganisms, +: 1–10 microorganisms, ++: 10–50 microorganisms, +++: > 50 microorganisms.

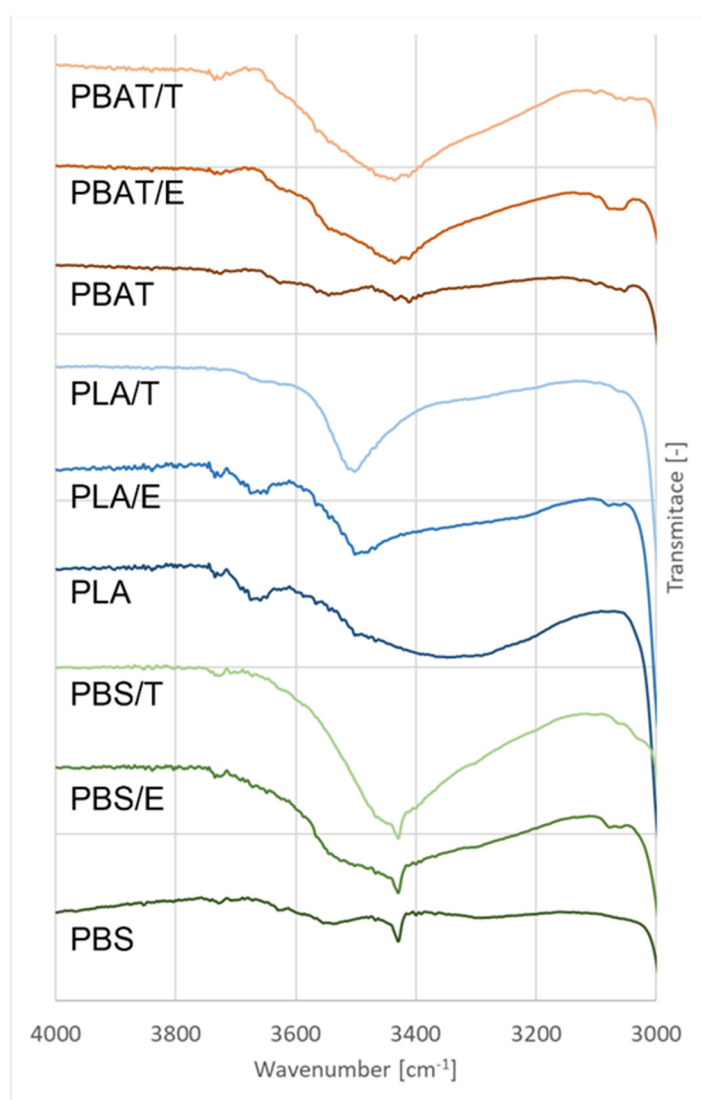

**Figure S1.** The FTIR spectra of pure and modified polymers in the range 4000 to 3000 cm<sup>-1</sup>; PLA: poly(lactic) acid, PBAT: poly(butylene adipate-co-terephthalate), PBS: poly(butylene succinate), E: 3% w/v eugenol, T: 3% w/v thymol.
